# Supplementary material for: Evaluation of a Novel FKS1 R1354H Mutation Associated with Caspofungin Resistance in Candida auris Using the CRISPR-Cas9 System
Source: MDPI journal article supplement (doi:10.3390/jof9050529), 2023-04-29
Supplement: s1 [file s1]

Supplementary Figure S2. *In vitro* growth curves of the *C. auris* strains

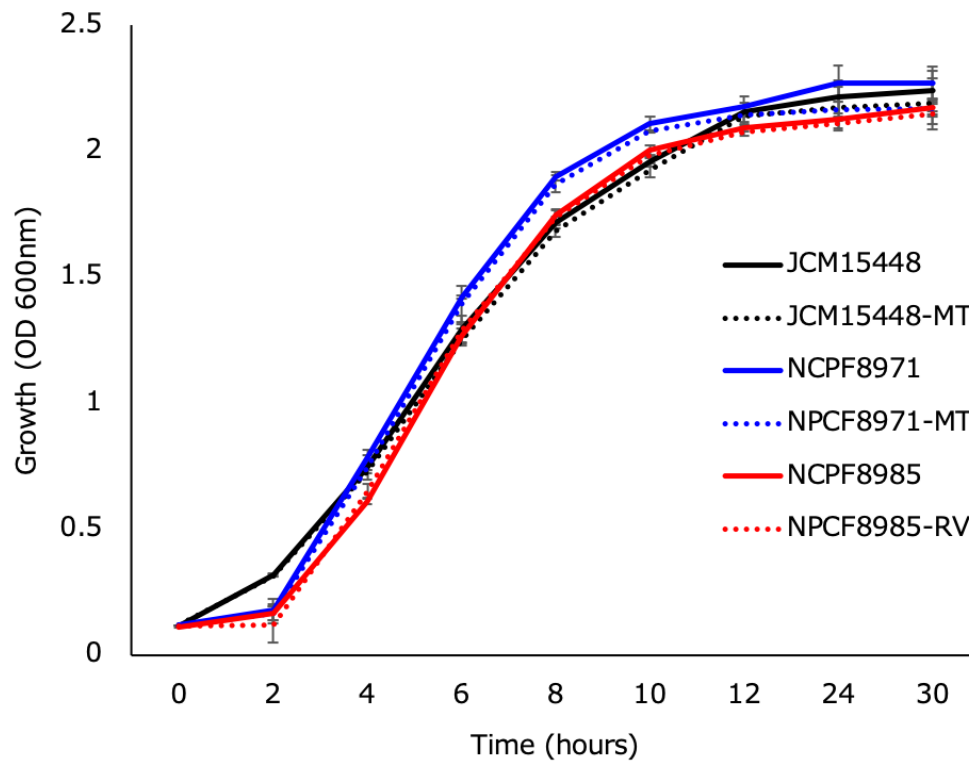

| Strains      | Doubling time (h) |
|--------------|-------------------|
| JCM15448     | 1.72 ± 0.01       |
| JCM15448-MT  | 1.77 ± 0.01       |
| NCPF8971     | 1.67 ± 0.00       |
| NPCF89871-MT | 1.69 ± 0.03       |
| NCPF8985     | 1.71 ± 0.02       |
| NPCF8985-RV  | 1.75 ± 0.03       |
